# Supplementary material for: Sleep and HbA1c in Patients With Type 2 Diabetes: Which Sleep Characteristics Matter Most?
Source: Oxford University Press journal article supplement (doi:10.2337/dc19-0550), 2019-11-12
Supplement: dc190550supplementarydata.pdf [file dc190550supplementarydata.pdf]

SUPPLEMENTARY DATA

**Supplementary Table 1. Missing data**

| Sample size, N                                                                                                                                                                                | Missing (N) |
|-----------------------------------------------------------------------------------------------------------------------------------------------------------------------------------------------|-------------|
| Age, years, mean (SD)                                                                                                                                                                         | 0           |
| Gender, %, men / women                                                                                                                                                                        | 0           |
| Country of birth, %, European / Non-European                                                                                                                                                  | 0           |
| Time of year in protocol, %, spring / summer / autumn / winter                                                                                                                                | 0           |
| Educational level, %, elementary not completed / elementary / lower vocational / lower secondary / intermediate secondary / intermediate vocational / higher secondary / college / university | 0           |
| Employment status, %, employed $\geq$ 12 hours/week / other                                                                                                                                   | 0           |
| Number of medications, mean (SD)                                                                                                                                                              | 0           |
| Polypharmacy ( $\geq$ 5 medications), %, yes / no                                                                                                                                             | 0           |
| Diabetes duration, years, mean (SD)                                                                                                                                                           | 8           |
| Glucose lowering medication, %, insulin / oral only / none                                                                                                                                    | 0           |
| BMI, kg/m <sup>2</sup> , mean (SD)                                                                                                                                                            | 12          |
| Physical activity, MET minutes, median (IQR)                                                                                                                                                  | 36          |
| Sleep apnea risk, %, low / high                                                                                                                                                               | 86          |
| Use of alcohol, %, less than weekly / weekly                                                                                                                                                  | 10          |
| Sleep medication, %, less than weekly / weekly                                                                                                                                                | 6           |
| Depressive symptoms, IDS score, median (IQR)                                                                                                                                                  | 8           |
| Diabetes distress, PAID-5 score, median (IQR)                                                                                                                                                 | 8           |
| Anxiety, BAI score, median (IQR)                                                                                                                                                              | 7           |
| <i>Sleep measures*</i>                                                                                                                                                                        |             |
| Sleep duration, minutes (hours:minutes), mean (SD)                                                                                                                                            | 26          |
| Variability in sleep duration, minutes, median (IQR)                                                                                                                                          | 28          |
| Mid-sleep time, time, mean (SD)                                                                                                                                                               | 26          |
| Variability in mid-sleep time, minutes, median (IQR)                                                                                                                                          | 28          |
| Sleep efficiency, %, median (IQR)                                                                                                                                                             | 26          |
| Sleep quality, PSQI score, median (IQR)                                                                                                                                                       | 6           |
| Insomnia symptoms, ISI score, median (IQR)                                                                                                                                                    | 7           |
| <i>Glycemic control</i>                                                                                                                                                                       |             |
| HbA <sub>1c</sub> , mmol/mol / %, mean (SD)                                                                                                                                                   | 5           |

\* Actigraphy data could be collected from 179 participants (7 days: N=143, 6 days N=25, 5 days N=5, 4 days N=1, 3 days N=1, 2 days N=2, 1 day N=2): 2 participants did not wear the actigraphy watch, 24 datasets were lost due to technical failure of the actigraphy device. Abbreviations: SD= standard deviation, BMI= body mass index, MET= Metabolic Equivalent of Task, IQR= inter quartile range, IDS= Inventory of Depressive Symptomatology, PAID= Problem Areas in Diabetes, BAI= Beck Anxiety Inventory, Abbreviations: CI= confidence interval, PSQI= Pittsburgh SQ Index, ISI= Insomnia Severity Index.

SUPPLEMENTARY DATA

**Supplementary Table 2.** Correlation matrix of sleep measures (correlation coefficient r, p-values (p<0.05 in bold))

| Sleep measure  | SD, minutes                        | V-SD, minutes                      | MST, time                          | V-MST, minutes                   | SE, %                            | SQ, PSQI score                     |
|----------------|------------------------------------|------------------------------------|------------------------------------|----------------------------------|----------------------------------|------------------------------------|
| V-SD, minutes  | -0.032,<br>p=0.335                 |                                    |                                    |                                  |                                  |                                    |
| MST, time      | 0.108,<br>p=0.077                  | 0.082,<br>p=0.139                  |                                    |                                  |                                  |                                    |
| V-MST, minutes | <b>-0.174,</b><br><b>p=0.011</b>   | <b>0.556,</b><br><b>p&lt;0.001</b> | 0.095,<br>p=0.105                  |                                  |                                  |                                    |
| SE, %          | <b>0.468,</b><br><b>p&lt;0.001</b> | <b>-0.236,</b><br><b>p=0.001</b>   | <b>-0.210,</b><br><b>p=0.003</b>   | <b>-0.190,</b><br><b>p=0.006</b> |                                  |                                    |
| SQ, PSQI score | -0.004,<br>p=0.479                 | <b>0.197,</b><br><b>p=0.005</b>    | <b>0.282,</b><br><b>p&lt;0.001</b> | 0.058,<br>p=0.222                | <b>-0.129,</b><br><b>p=0.044</b> |                                    |
| INS, ISI score | 0.019,<br>p=0.402                  | <b>0.154,</b><br><b>p=0.021</b>    | <b>0.143,</b><br><b>p=0.029</b>    | 0.019,<br>p=0.403                | -0.066,<br>p=0.193               | <b>0.779,</b><br><b>p&lt;0.001</b> |

Significance one-tailed. Abbreviations: SD= total sleep duration, V-SD= variability in sleep duration, V-MST= variability in mid-sleep time, MST= mid-sleep time, SQ= subjective sleep quality, PSQI= Pittsburgh Sleep Quality Index, INS= subjective insomnia symptoms, ISI= Insomnia Severity Index.

SUPPLEMENTARY DATA

**Supplementary Table 3.** Factor analysis of the sleep measures (factor loadings >0.4 in bold)

| Sleep measure  | Factor loadings |              |              |
|----------------|-----------------|--------------|--------------|
|                | 1               | 2            | 3            |
| SD, minutes    | -0.003          | -0.012       | <b>0.477</b> |
| V-SD, minutes  | 0.130           | <b>0.990</b> | -0.042       |
| MST, time      | 0.280           | 0.039        | -0.174       |
| V-MST, minutes | 0.021           | <b>0.555</b> | -0.089       |
| SE, %          | -0.117          | -0.181       | <b>0.976</b> |
| SQ, PSQI score | <b>0.778</b>    | 0.054        | 0.036        |
| INS, ISI score | <b>0.997</b>    | 0.067        | -0.001       |

Abbreviations: SD= total sleep duration, V-SD= variability in sleep duration, V-MST= variability in mid-sleep time, MST= mid-sleep time, SQ= subjective sleep quality, PSQI= Pittsburgh Sleep Quality Index, INS= subjective insomnia symptoms, ISI= Insomnia Severity Index

SUPPLEMENTARY DATA

**Supplementary Table 4.** Associations of potential confounding or explanatory factors with the individual sleep measures and HbA<sub>1c</sub> (regression coefficient *B*, p-values (p<0.10 in bold))

|                                                           | SD, minutes                      | V-SD, minutes                       | MST, time                          | V-MST, minutes                   | SE, %                | SQ, PSQI score                     | INS, ISI score                     | HbA <sub>1c</sub> , mmol/mol       |
|-----------------------------------------------------------|----------------------------------|-------------------------------------|------------------------------------|----------------------------------|----------------------|------------------------------------|------------------------------------|------------------------------------|
| Age, years                                                | 0.100,<br>p=0.856                | <b>-0.056,</b><br><b>p&lt;0.001</b> | 0.115,<br>p=0.997                  | <b>-0.300,</b><br><b>p=0.008</b> | 7.782,<br>p=0.472    | -0.004,<br>p=0.486                 | <b>-0.025,</b><br><b>p=0.042</b>   | <b>-0.324,</b><br><b>p=0.002</b>   |
| Gender (men reference)                                    | 1.016,<br>p=0.917                | 0.047,<br>p=0.870                   | 733.309,<br>p=0.194                | -0.071,<br>p=0.972               | 169.057,<br>p=0.375  | <b>0.386,</b><br><b>p&lt;0.001</b> | <b>0.907,</b><br><b>p&lt;0.001</b> | 1.930,<br>p=0.320                  |
| Country of birth (European reference)                     | -12.030,<br>p=0.423              | <b>0.855,</b><br><b>p=0.050</b>     | 871.554,<br>p=0.317                | 3.518,<br>p=0.253                | -386.701,<br>p=0.187 | <b>0.301,</b><br><b>p=0.048</b>    | <b>0.912,</b><br><b>p=0.008</b>    | <b>7.207,</b><br><b>p=0.011</b>    |
| Natural day length (shorter day length reference)         | 5.856,<br>p=0.544                | <b>-0.588,</b><br><b>p=0.037</b>    | -487.105,<br>p=0.384               | -2.882,<br>p=0.145               | 189.517,<br>p=0.315  | <b>-0.265,</b><br><b>p=0.005</b>   | <b>-0.717,</b><br><b>p=0.001</b>   | <b>-3.211,</b><br><b>p=0.092</b>   |
| Educational level                                         | 1.007,<br>p=0.610                | 0.014,<br>p=0.811                   | -120.397,<br>p=0.292               | -0.086,<br>p=0.832               | -15.217,<br>p=0.693  | <b>-0.062,</b><br><b>p=0.001</b>   | <b>-0.103,</b><br><b>p=0.020</b>   | 0.367,<br>p=0.343                  |
| Employment status (employed ≥ 12 hours/week reference)    | <b>20.019,</b><br><b>p=0.080</b> | <b>-0.640,</b><br><b>p=0.055</b>    | <b>1306.241,</b><br><b>p=0.048</b> | <b>-5.865,</b><br><b>p=0.012</b> | 18.460,<br>p=0.934   | 0.181,<br>p=0.116                  | 0.157,<br>p=0.548                  | <b>-6.913,</b><br><b>p=0.002</b>   |
| Number of medications                                     | 1.655,<br>p=0.189                | 0.003,<br>p=0.927                   | <b>135.415,</b><br><b>p=0.058</b>  | -0.079,<br>p=0.7762              | 10.691,<br>p=0.664   | <b>0.436,</b><br><b>p&lt;0.001</b> | <b>0.128,</b><br><b>p&lt;0.001</b> | -0.148,<br>p=0.560                 |
| Glucose lowering medication (oral only or none reference) | -4.334,<br>p=0.651               | <b>0.520,</b><br><b>p=0.063</b>     | 579.170,<br>p=0.297                | 3.359,<br>p=0.087                | -177.713,<br>p=0.343 | 0.146,<br>p=0.132                  | 0.295,<br>p=0.179                  | <b>8.417,</b><br><b>p&lt;0.001</b> |
| BMI, kg/m <sup>2</sup>                                    | 0.337,<br>p=0.683                | 0.005,<br>p=0.846                   | -21.360,<br>p=0.654                | 0.112,<br>p=0.531                | 13.435,<br>p=0.407   | <b>0.016,</b><br><b>p=0.052</b>    | 0.030,<br>p=0.103                  | 0.127,<br>p=0.437                  |
| Physical activity, MET minutes                            | -0.262,<br>p=0.148               | 0.002,<br>p=0.729                   | <b>-24.471,</b><br><b>p=0.011</b>  | -0.008,<br>p=0.831               | 3.772,<br>p=0.280    | <b>-0.005,</b><br><b>p=0.005</b>   | <b>-0.008,</b><br><b>p=0.048</b>   | 0.011,<br>p=0.754                  |
| Sleep apnea risk (low reference)                          | 2.674,<br>p=0.845                | 0.183,<br>p=0.627                   | 1156.724,<br>p=0.127               | 0.883,<br>p=0.751                | 150.459,<br>p=0.526  | <b>0.390,</b><br><b>p=0.003</b>    | <b>0.758,</b><br><b>p=0.014</b>    | 1,409,<br>p=0.608                  |
| Use of alcohol (less than weekly reference)               | 15.796,<br>p=0.148               | -0.125,<br>p=0.729                  | -                                  | -0.982,<br>p=0.831               | 242.673,<br>p=0.280  | <b>-0.213,</b><br><b>p=0.005</b>   | <b>-0.374,</b><br><b>p=0.048</b>   | -2.286,<br>p=0.754                 |

SUPPLEMENTARY DATA

|                                               |                    |                                 |                                    |                                 |                      |                                    |                                    |                                 |
|-----------------------------------------------|--------------------|---------------------------------|------------------------------------|---------------------------------|----------------------|------------------------------------|------------------------------------|---------------------------------|
|                                               | p=0.105            | p=0.664                         | 116.565.160,<br>p=0.837            | p=0.628                         | p=0.205              | <b>p=0.030</b>                     | <b>p=0.097</b>                     | p=0.249                         |
| Sleep medication (less than weekly reference) | 16.365,<br>p=0.223 | <b>0.688,</b><br><b>p=0.079</b> | <b>2334.624,</b><br><b>p=0.002</b> | 1.047,<br>p=0.705               | -300.929,<br>p=0.251 | <b>0.736,</b><br><b>p&lt;0.001</b> | <b>0.966,</b><br><b>p=0.001</b>    | 0.930,<br>p=0.735               |
| Depressive symptoms, IDS score                | 1.034,<br>p=0.765  | <b>0.193,</b><br><b>p=0.055</b> | 294.904,<br>p=0.136                | 0.779,<br>p=0.275               | -6.296,<br>p=0.926   | <b>0.299,</b><br><b>p&lt;0.001</b> | <b>0.745,</b><br><b>p&lt;0.001</b> | 0.408,<br>p=0.559               |
| Diabetes distress, PAID-5 score               | -0.424,<br>p=0.908 | <b>0.309,</b><br><b>p=0.004</b> | 306.850,<br>p=0.145                | <b>1.414,</b><br><b>p=0.062</b> | 53.662,<br>p=0.455   | <b>0.141,</b><br><b>p&lt;0.001</b> | <b>0.442,</b><br><b>p&lt;0.001</b> | <b>2.287,</b><br><b>p=0.002</b> |
| Anxiety, BAI score                            | 0.838,<br>p=0.798  | 0.145,<br>p=0.128               | 190.414,<br>p=0.310                | 0.535,<br>p=0.426               | 14.811,<br>p=0.816   | <b>0.245,</b><br><b>p&lt;0.001</b> | <b>0.625,</b><br><b>p&lt;0.001</b> | 0.238,<br>p=0.720               |

Abbreviations: SD= total sleep duration, V-SD= variability in sleep duration, V-MST= variability in mid-sleep time, MST= mid-sleep time, SQ= subjective sleep quality, PSQI= Pittsburgh Sleep Quality Index, INS= subjective insomnia symptoms, ISI= Insomnia Severity Index, BMI= body mass index, MET= Metabolic Equivalent of Task, IQR= inter quartile range, IDS= Inventory of Depressive Symptomatology, PAID= Problem Areas in Diabetes, BAI= Beck Anxiety Inventory

SUPPLEMENTARY DATA

**Supplemental Table 5.** Univariate associations between individual sleep measures and HbA<sub>1c</sub> (parameters of unadjusted and adjusted regression models; p<0.05 in bold)

|                           |                                        | Age                        | Gender                     | Sleep apnea risk           | Depressive symptoms        | Number of medications      |
|---------------------------|----------------------------------------|----------------------------|----------------------------|----------------------------|----------------------------|----------------------------|
| Underlying sleep variable | Sleep measure                          | p-value interaction effect |
| Sleep quantity            | Sleep duration, minutes                | 0.228                      | 0.073                      | 0.640                      | 0.820                      | 0.259                      |
|                           | Sleep efficiency, %                    | 0.408                      | 0.309                      | 0.969                      | 0.526                      | 0.709                      |
| Sleep variability         | Variability in sleep duration, minutes | 0.146                      | 0.155                      | 0.217                      | 0.618                      | 0.070                      |
|                           | Variability in mid-sleep time, minutes | 0.131                      | 0.135                      | <b>0.028</b>               | 0.593                      | 0.479                      |
| Mid-sleep time            | Mid-sleep time, time                   | 0.994                      | 0.317                      | <b>0.031</b>               | 0.142                      | 0.843                      |
| Sleep complaints          | Sleep quality, PSQI score              | 0.335                      | 0.891                      | 0.658                      | 0.533                      | 0.716                      |
|                           | Insomnia symptoms, ISI score           | 0.151                      | 0.964                      | 0.531                      | 0.799                      | 0.496                      |

Abbreviations: CI= confidence interval, PSQI= Pittsburgh Sleep Quality Index, ISI= Insomnia Severity Index

SUPPLEMENTARY DATA

**Supplementary Table 6.** Subgroup analyses based on the risk for sleep apnea for the association between (variability in) mid-sleep time and HbA<sub>1c</sub> (p<0.05 in bold)

| Risk for sleep apnea | N  | Variability in mid-sleep time |                 |              |                | Mid-sleep time |                   |              |                |
|----------------------|----|-------------------------------|-----------------|--------------|----------------|----------------|-------------------|--------------|----------------|
|                      |    | beta                          | 95% CI          | p-value      | R <sup>2</sup> | beta           | 95% CI            | P-value      | R <sup>2</sup> |
| Low                  | 31 | -0.126                        | -0.411 to 0.158 | 0.371        | 2.8%           | 0.516          | (0.159 to 0.873)  | <b>0.006</b> | 23.1%          |
| High                 | 70 | 0.308                         | 0.075 to 0.541  | <b>0.010</b> | 9.3%           | -0.043         | (-0.290 to 0.203) | 0.726        | 0.2%           |
